# Supplementary material for: Elucidation of a detection mechanism of a fluorescent sensor based on photo-induced electron transfer for water
Source: Royal Society of Chemistry journal article supplement (doi:10.1039/d2nj04153g), 2022-01-01
Supplement: d2nj04153g1.pdf [file d2nj04153g1.pdf]

## Supplementary Information

### **Elucidation of a detection mechanism of fluorescent sensor based on photo-induced electron transfer for water**

Takuma Fumoto, Keiichi Imato and Yousuke Ooyama\*

*Applied Chemistry Program, Graduate School of Advanced Science and Engineering, Hiroshima University, 1-4-1 Kagamiyama, Higashi-Hiroshima 739-8527, Japan. E-mail: yooyama@hiroshima-u.ac.jp*

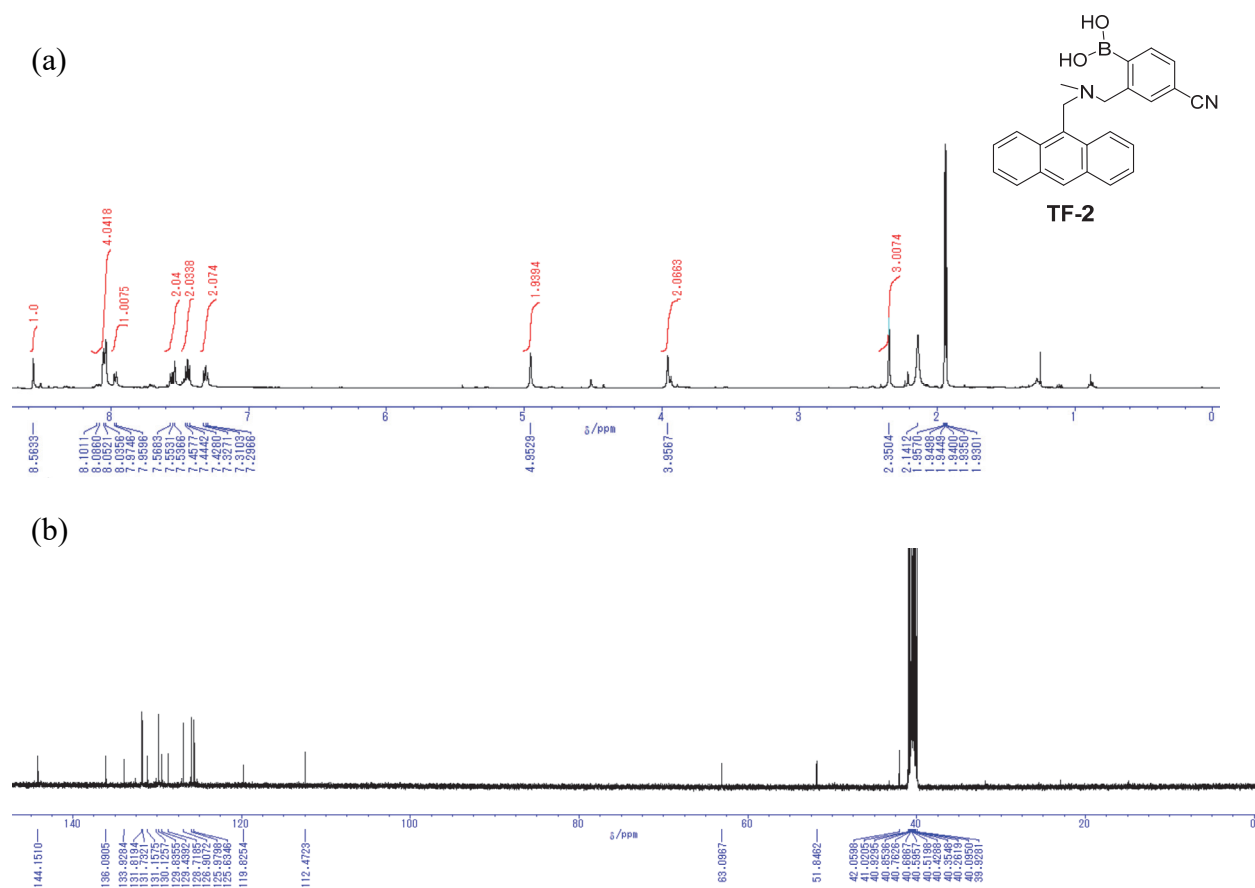

**Fig. S1** (a)  $^1\text{H}$  NMR (500 MHz) spectrum of TF-2 in acetonitrile- $\text{d}_3$ . (b)  $^{13}\text{C}$  NMR (125 MHz) spectrum of TF-2 in DMSO- $\text{d}_6$ .

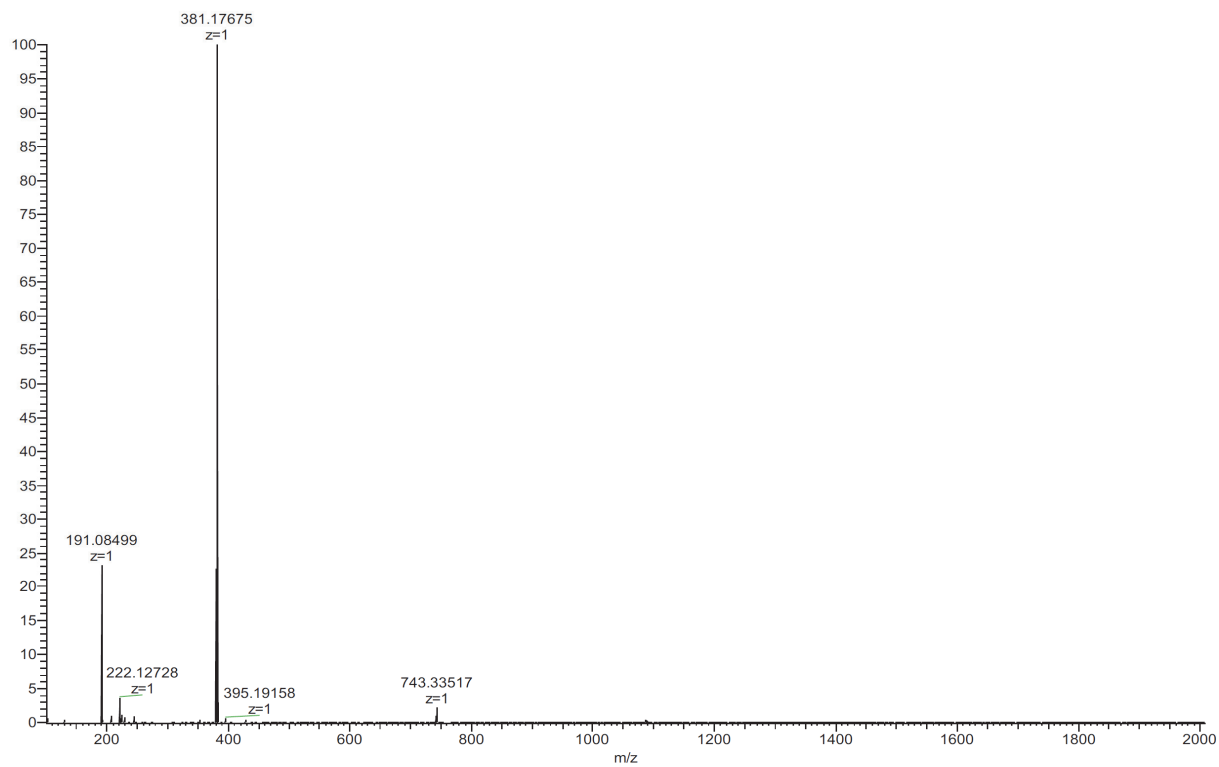

**Fig. S2** HRMS (ESI) spectrum of TF-2.

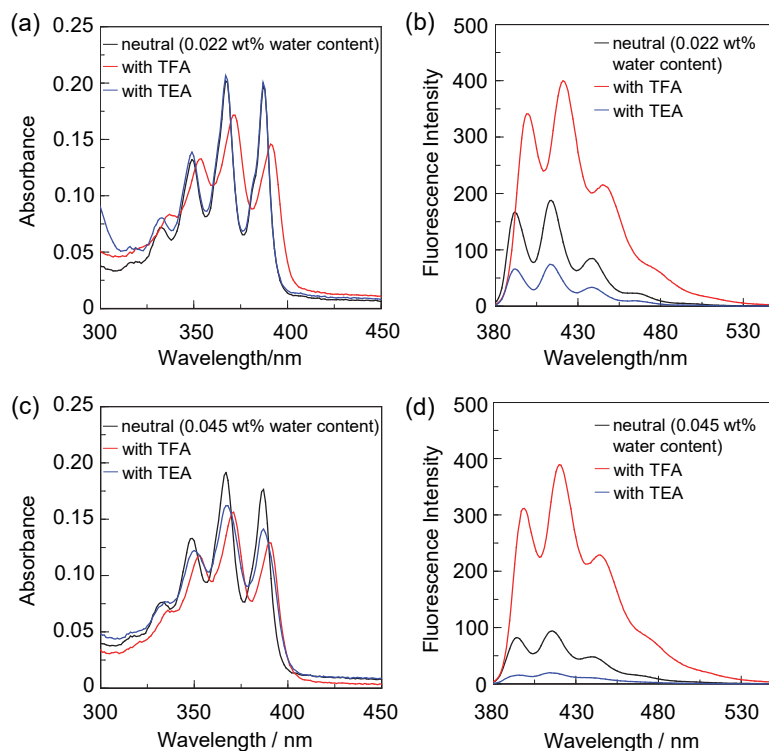

**Fig. S3** (a) Photoabsorption and (b) fluorescence spectra ( $\lambda^{\text{ex}} = 366 \text{ nm}$ ) of **TF-2** ( $2.0 \times 10^{-5} \text{ M}$ ) in neutral THF (0.022 wt% water content) and in THF containing  $\text{CF}_3\text{COOH}$  (TFA) (0.2 M) or triethylamine (TEA) (0.2 M). (c) Photoabsorption and (d) fluorescence spectra ( $\lambda^{\text{ex}} = 366 \text{ nm}$ ) of **TF-2** ( $2.0 \times 10^{-5} \text{ M}$ ) in neutral ethanol (0.045 wt% water content) and in ethanol containing TFA (0.2 M) or TEA (0.2 M).

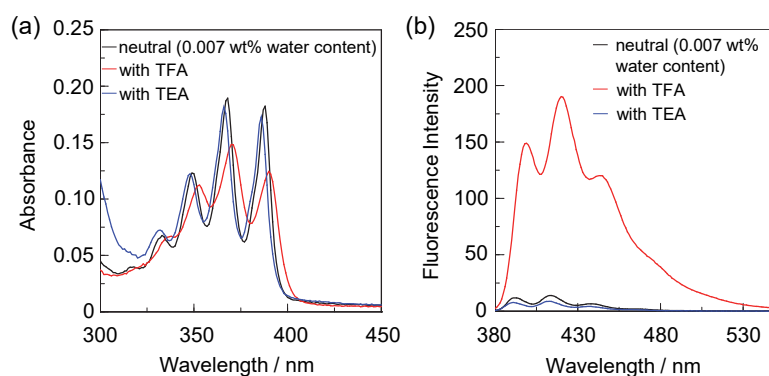

**Fig. S4** (a) Photoabsorption and (b) fluorescence spectra ( $\lambda^{\text{ex}} = 370 \text{ nm}$ ) of **OF-2** ( $2.0 \times 10^{-5} \text{ M}$ ) in neutral acetonitrile (0.007 wt% water content) and in acetonitrile containing  $\text{CF}_3\text{COOH}$  (TFA) (0.2 M) or triethylamine (TEA) (0.2 M).

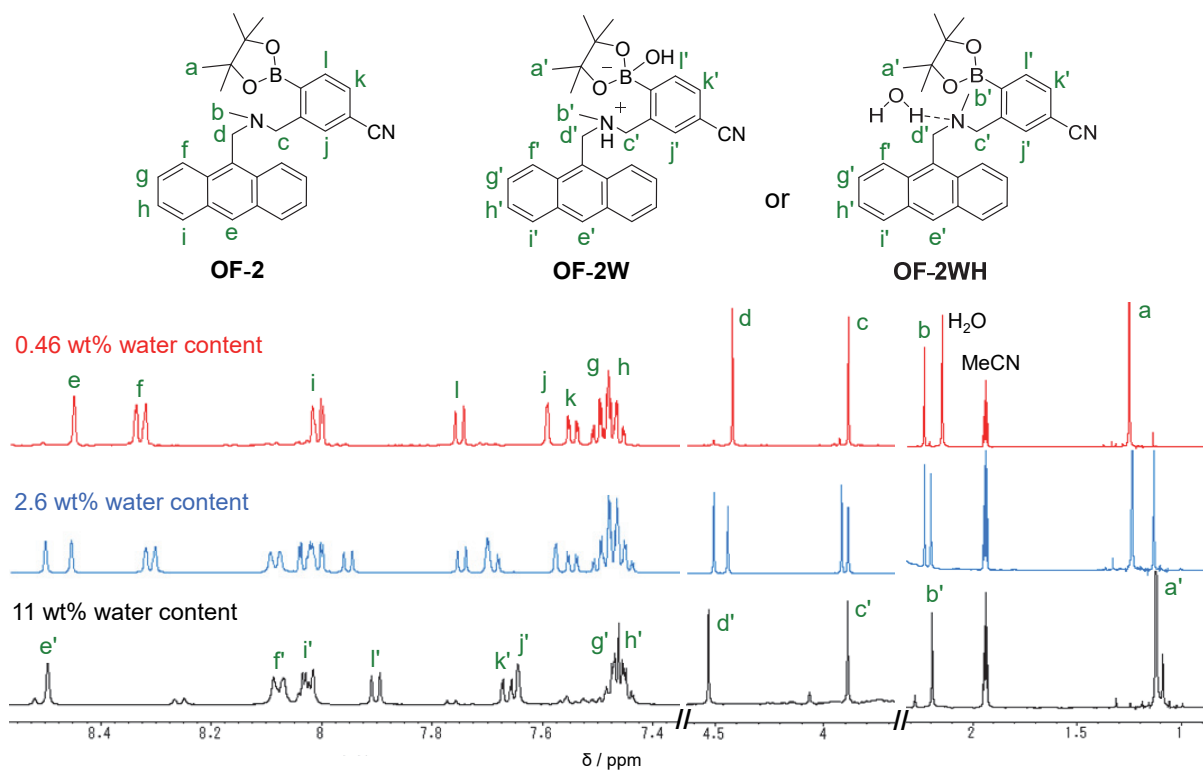

**Fig. S5**  $^1\text{H}$  NMR spectra of **OF-2** ( $2.0 \times 10^{-2}$  M) in acetonitrile- $d_3$  with 0.46 wt%, 2.6 wt% and 11 wt% water content.

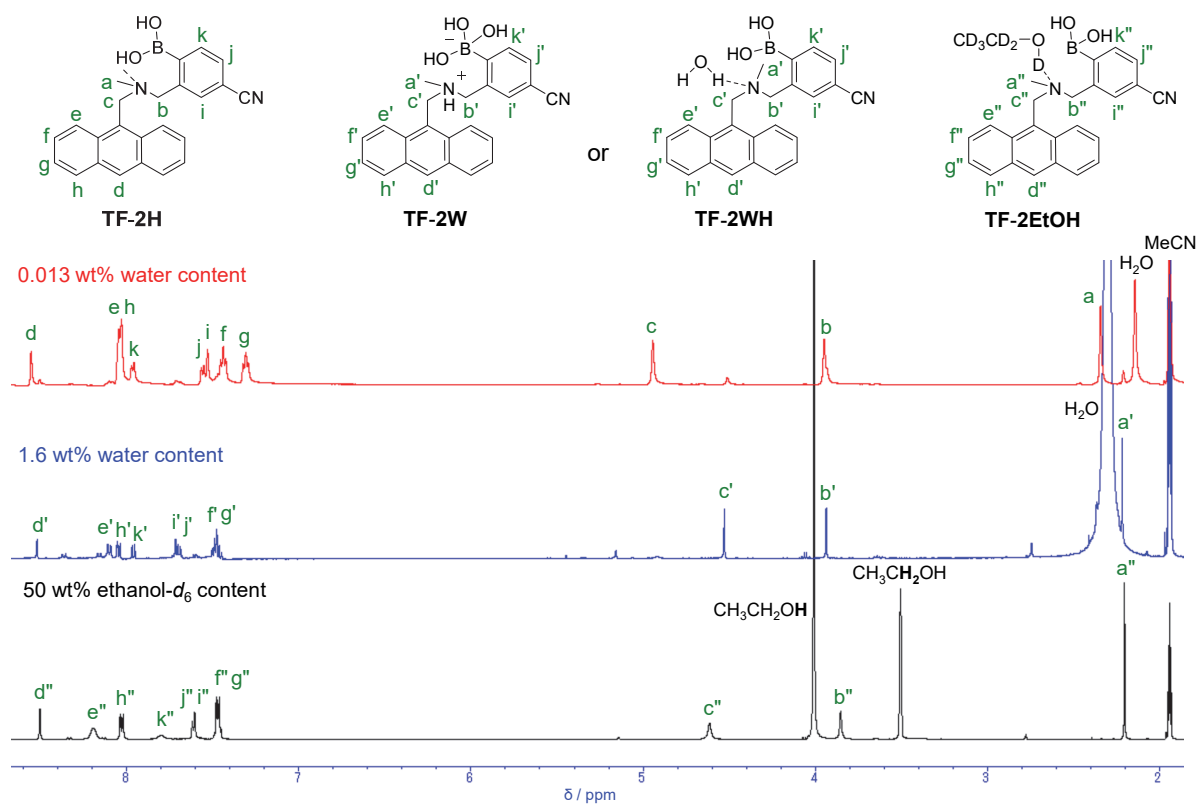

**Fig. S6**  $^1\text{H}$  NMR spectra of **TF-2** ( $2.0 \times 10^{-2}$  M) in acetonitrile- $d_3$  with 0.013 wt% and 1.6 wt% water content and 50 wt% ethanol- $d_6$  content.

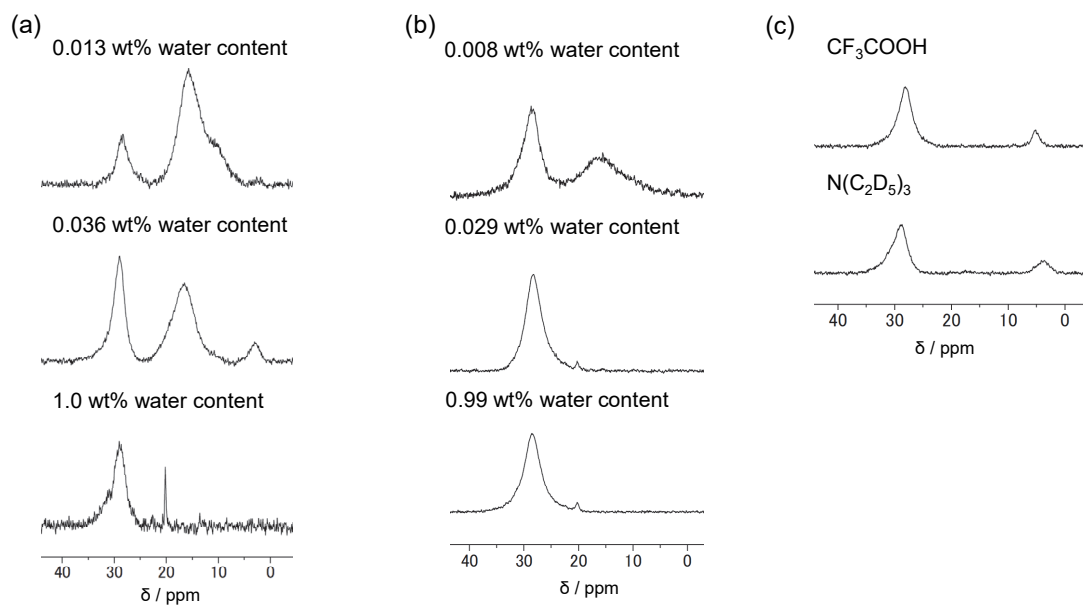

**Fig. S7**  $^{11}\text{B}$  NMR spectra of TF-2 ( $2.0 \times 10^{-2}$  M) in (a) acetonitrile- $d_3$  with 0.013 wt%, 0.036 wt% and 1.0 wt% water content, (b) THF- $d_8$  with 0.008 wt%, 0.029 wt% and 0.99 wt% water content, and (c) acetonitrile- $d_3$  with  $\text{CF}_3\text{COOH}$  (2.0 M) or  $\text{N}(\text{C}_2\text{D}_5)_3$  (2.0 M).

**Table S1** Crystal data and structure refinement parameters for **TF-2** (CCDC 2192821).

| Compound                                                                              | TF-2                                                            |
|---------------------------------------------------------------------------------------|-----------------------------------------------------------------|
| Molecular formula                                                                     | C <sub>24</sub> H <sub>21</sub> N <sub>2</sub> O <sub>2</sub> B |
| Formula weight                                                                        | 380.24                                                          |
| Number of reflection used for unit cell determination (2 $\theta$ range/ $^{\circ}$ ) | 6435 (4.76-55.4)                                                |
| Temperature/K                                                                         | 173(2)                                                          |
| Crystal System                                                                        | monoclinic                                                      |
| Space group                                                                           | P2 <sub>1</sub> /c                                              |
| a/ $\text{\AA}$                                                                       | 12.7784(15)                                                     |
| b/ $\text{\AA}$                                                                       | 10.4451(12)                                                     |
| c/ $\text{\AA}$                                                                       | 15.3432(18)                                                     |
| $\alpha$ / $^{\circ}$                                                                 |                                                                 |
| $\beta$ / $^{\circ}$                                                                  | 104.3580(10)                                                    |
| $\gamma$ / $^{\circ}$                                                                 |                                                                 |
| V/ $\text{\AA}^3$                                                                     | 1983.9(4)                                                       |
| Z                                                                                     | 4                                                               |
| D/g cm <sup>-3</sup>                                                                  | 1.273                                                           |
| F(000)                                                                                | 800.0                                                           |
| Radiation                                                                             | Mo-K $\alpha$ ( $\lambda$ = 0.71073 $\text{\AA}$ )              |
| Crystal size/mm <sup>3</sup>                                                          | 0.20 $\times$ 0.17 $\times$ 0.06                                |
| Range of indices $h$ ; $k$ ; $l$                                                      | -16, 16; -13, 13; -20, 20                                       |
| Reflections collected (unique)                                                        | 4786                                                            |
| Reflection observed with $I_0 > 2\sigma I_0$                                          | 3874                                                            |
| Number of parameters                                                                  | 265                                                             |
| Final R indexes [ $I_0 > 2\sigma I_0$ ]                                               | $R_1 = 0.0426$ , $wR_2 = 0.0975$                                |
| Final R indexes [all data]                                                            | $R_1 = 0.0534$ , $wR_2 = 0.1045$                                |
| Goodness-of-fit on $F^2$                                                              | 0.979                                                           |
| Max. Shift/Error in final cycle                                                       | 0.00                                                            |
| Max. peak in final diff. map/e $\text{\AA}^{-3}$                                      | 0.282                                                           |
| Min. peak in final diff. map/e $\text{\AA}^{-3}$                                      | -0.238                                                          |

**Table S2** Geometrical coordinates of the optimized **OF-2** by DFT at the B3LYP/6-31G(d,p) level.

Cartesian coordinates:

| Center Number | Atomic Number | Atomic Type | Coordinates (Angstroms) |            |            |
|---------------|---------------|-------------|-------------------------|------------|------------|
|               |               |             | X                       | Y          | Z          |
| 1             | C             | 0           | -2.0580709              | -0.2056343 | 1.2099493  |
| 2             | C             | 0           | -0.7514045              | -0.1479518 | 1.7949184  |
| 3             | H             | 0           | 0.0342839               | 0.3917148  | 1.2843139  |
| 4             | C             | 0           | -0.4670387              | -0.782374  | 2.9766883  |
| 5             | H             | 0           | 0.536122                | -0.7205625 | 3.3879281  |
| 6             | C             | 0           | -1.4660718              | -1.5276266 | 3.6638306  |
| 7             | H             | 0           | -1.2225493              | -2.0221768 | 4.5995978  |
| 8             | C             | 0           | -2.727489               | -1.6166766 | 3.1410393  |
| 9             | H             | 0           | -3.5021064              | -2.1819219 | 3.6527593  |
| 10            | C             | 0           | -3.0646185              | -0.9680865 | 1.9120497  |
| 11            | C             | 0           | -4.3538036              | -1.0521795 | 1.3810069  |
| 12            | H             | 0           | -5.111179               | -1.6238793 | 1.9124888  |
| 13            | C             | 0           | -4.6951286              | -0.4181063 | 0.1849895  |
| 14            | C             | 0           | -6.0205435              | -0.5208832 | -0.3431393 |
| 15            | H             | 0           | -6.7495761              | -1.102008  | 0.2155489  |
| 16            | C             | 0           | -6.3667147              | 0.090031   | -1.5162872 |
| 17            | H             | 0           | -7.3764203              | 0.0044116  | -1.9063821 |
| 18            | C             | 0           | -5.3930354              | 0.8432932  | -2.2300675 |
| 19            | H             | 0           | -5.6691711              | 1.3248014  | -3.163681  |
| 20            | C             | 0           | -4.1136204              | 0.9687329  | -1.7559857 |
| 21            | H             | 0           | -3.4026233              | 1.5457356  | -2.3336174 |
| 22            | C             | 0           | -3.6962044              | 0.3513423  | -0.5290392 |
| 23            | C             | 0           | -2.3838602              | 0.4552528  | -0.0015468 |
| 24            | C             | 0           | -1.3210419              | 1.2968978  | -0.6885134 |
| 25            | H             | 0           | -1.7879597              | 2.0069444  | -1.3894374 |
| 26            | H             | 0           | -0.8269103              | 1.9177435  | 0.0656015  |
| 27            | C             | 0           | -0.7903251              | -0.3313504 | -2.4340789 |
| 28            | H             | 0           | -1.2318503              | 0.2409538  | -3.271472  |
| 29            | H             | 0           | -1.5626946              | -0.9929369 | -2.0363059 |
| 30            | H             | 0           | 0.0234201               | -0.9447809 | -2.8295042 |
| 31            | C             | 0           | 0.7899584               | 1.4018431  | -1.8796528 |
| 32            | H             | 0           | 0.3707213               | 2.2374117  | -2.4720246 |
| 33            | H             | 0           | 1.4084209               | 0.8056885  | -2.5555384 |
| 34            | C             | 0           | 1.6700428               | 1.9563325  | -0.7754959 |
| 35            | C             | 0           | 1.6729043               | 3.3249859  | -0.510399  |

|    |   |   |            |            |            |
|----|---|---|------------|------------|------------|
| 36 | H | 0 | 1.0576463  | 3.9930832  | -1.1054321 |
| 37 | C | 0 | 2.4607911  | 3.8582459  | 0.5242248  |
| 38 | C | 0 | 3.2443555  | 3.0047381  | 1.3130737  |
| 39 | H | 0 | 3.8457372  | 3.4130582  | 2.1182101  |
| 40 | C | 0 | 3.2365822  | 1.6384813  | 1.0473001  |
| 41 | H | 0 | 3.8432426  | 0.9770615  | 1.658437   |
| 42 | C | 0 | 2.4738772  | 1.0897237  | 0.0024781  |
| 43 | C | 0 | 2.4530888  | 5.2704784  | 0.7744659  |
| 44 | N | 0 | -0.2664937 | 0.5174016  | -1.3663719 |
| 45 | N | 0 | 2.4474397  | 6.4164989  | 0.9755239  |
| 46 | C | 0 | 2.8325504  | -2.6752403 | 0.2177161  |
| 47 | C | 0 | 3.0709177  | -2.4166567 | -1.3204042 |
| 48 | B | 0 | 2.5993587  | -0.4521397 | -0.2534303 |
| 49 | O | 0 | 2.8819699  | -1.3235902 | 0.7674071  |
| 50 | O | 0 | 2.5670481  | -1.0560302 | -1.4871338 |
| 51 | C | 0 | 1.4377095  | -3.2272102 | 0.5334152  |
| 52 | H | 0 | 1.2753123  | -3.189279  | 1.6133144  |
| 53 | H | 0 | 0.6557918  | -2.6273322 | 0.0613401  |
| 54 | H | 0 | 1.3343687  | -4.2656826 | 0.2050363  |
| 55 | C | 0 | 3.9046327  | -3.5133336 | 0.9096429  |
| 56 | H | 0 | 3.6680519  | -3.6026815 | 1.973474   |
| 57 | H | 0 | 3.9419768  | -4.5225045 | 0.4866466  |
| 58 | H | 0 | 4.8939181  | -3.0612401 | 0.8208181  |
| 59 | C | 0 | 4.5534103  | -2.3811056 | -1.7134317 |
| 60 | H | 0 | 5.0028807  | -3.3778469 | -1.6817602 |
| 61 | H | 0 | 4.640827   | -1.9968447 | -2.7331784 |
| 62 | H | 0 | 5.1252159  | -1.7218499 | -1.0545557 |
| 63 | C | 0 | 2.2998322  | -3.338232  | -2.2617068 |
| 64 | H | 0 | 2.4991498  | -3.0534134 | -3.2987601 |
| 65 | H | 0 | 2.6167929  | -4.3781568 | -2.1316611 |
| 66 | H | 0 | 1.2235112  | -3.2795402 | -2.0935443 |



**Table S3** Geometrical coordinates of the optimized **TF-2** by DFT at the B3LYP/6-31G(d,p) level.

Cartesian coordinates:

| Center Number | Atomic Number | Atomic Type | Coordinates (Angstroms) |            |            |
|---------------|---------------|-------------|-------------------------|------------|------------|
|               |               |             | X                       | Y          | Z          |
| 1             | B             | 0           | 2.6387425               | 1.6177721  | 1.7278803  |
| 2             | C             | 0           | -1.6126904              | 1.0427043  | -0.6368494 |
| 3             | C             | 0           | -0.3886961              | 1.7706239  | -0.7961478 |
| 4             | H             | 0           | 0.5537546               | 1.2904757  | -0.5686191 |
| 5             | C             | 0           | -0.37893                | 3.0721344  | -1.2259363 |
| 6             | H             | 0           | 0.5672552               | 3.5933024  | -1.3370489 |
| 7             | C             | 0           | -1.5918669              | 3.7519968  | -1.526359  |
| 8             | H             | 0           | -1.5629039              | 4.7839615  | -1.8626102 |
| 9             | C             | 0           | -2.7862459              | 3.098901   | -1.3921668 |
| 10            | H             | 0           | -3.7225499              | 3.6008111  | -1.621148  |
| 11            | C             | 0           | -2.8388319              | 1.7394307  | -0.9528947 |
| 12            | C             | 0           | -4.0582476              | 1.0696427  | -0.8317563 |
| 13            | H             | 0           | -4.9788333              | 1.5969598  | -1.0707226 |
| 14            | C             | 0           | -4.1258677              | -0.2617242 | -0.4175769 |
| 15            | C             | 0           | -5.3863211              | -0.9287781 | -0.3084365 |
| 16            | H             | 0           | -6.2838793              | -0.3691799 | -0.5579764 |
| 17            | C             | 0           | -5.4668101              | -2.2320956 | 0.0967764  |
| 18            | H             | 0           | -6.4294374              | -2.728014  | 0.1746631  |
| 19            | C             | 0           | -4.2761868              | -2.9422195 | 0.4167156  |
| 20            | H             | 0           | -4.3417091              | -3.9779217 | 0.7370333  |
| 21            | C             | 0           | -3.0494591              | -2.3383826 | 0.3255264  |
| 22            | H             | 0           | -2.1708151              | -2.9167936 | 0.5818704  |
| 23            | C             | 0           | -2.9063455              | -0.9731872 | -0.0942513 |
| 24            | C             | 0           | -1.6584141              | -0.307213  | -0.2038801 |
| 25            | C             | 0           | -0.358352               | -1.0267961 | 0.1052626  |
| 26            | H             | 0           | -0.4947247              | -2.1153321 | 0.0431811  |
| 27            | H             | 0           | 0.3817262               | -0.7796282 | -0.6594349 |
| 28            | C             | 0           | -0.6253787              | -1.0331918 | 2.5484175  |
| 29            | H             | 0           | -0.7636527              | -2.1224845 | 2.6461154  |
| 30            | H             | 0           | -1.6042008              | -0.5693986 | 2.422005   |
| 31            | H             | 0           | -0.1806385              | -0.6556963 | 3.4734598  |
| 32            | C             | 0           | 1.5681503               | -1.3148482 | 1.5833799  |
| 33            | H             | 0           | 1.480913                | -2.4101024 | 1.4838458  |
| 34            | H             | 0           | 1.884206                | -1.1160484 | 2.6130088  |
| 35            | C             | 0           | 2.6370932               | -0.8074595 | 0.6286566  |

|    |   |   |           |            |            |
|----|---|---|-----------|------------|------------|
| 36 | C | 0 | 3.1595242 | -1.7004959 | -0.3090269 |
| 37 | H | 0 | 2.7751388 | -2.7143746 | -0.3654595 |
| 38 | C | 0 | 4.1867844 | -1.3131515 | -1.1841459 |
| 39 | C | 0 | 4.7064327 | -0.0134149 | -1.110385  |
| 40 | H | 0 | 5.5052678 | 0.2880513  | -1.7795647 |
| 41 | C | 0 | 4.1897193 | 0.8705478  | -0.1687992 |
| 42 | H | 0 | 4.6031299 | 1.8714378  | -0.0982957 |
| 43 | C | 0 | 3.1531879 | 0.5113182  | 0.7108832  |
| 44 | C | 0 | 4.7006804 | -2.2491062 | -2.1416531 |
| 45 | N | 0 | 0.2430924 | -0.6742083 | 1.4182397  |
| 46 | N | 0 | 5.1149685 | -3.0100255 | -2.9182077 |
| 47 | O | 0 | 3.5388885 | 2.5985044  | 2.0597185  |
| 48 | H | 0 | 3.1225095 | 3.2494779  | 2.6400608  |
| 49 | O | 0 | 1.3859104 | 1.6570821  | 2.2413767  |
| 50 | H | 0 | 0.8033416 | 0.9451672  | 1.8651319  |
